# Supplementary material for: Estimating internal dissolved methane loading in rivers using a mass balance approach
Source: PeerJ. 2025 Oct 15;13:e20238. doi: 10.7717/peerj.20238 (PMC12535232; doi:10.7717/peerj.20238)
Supplement: Supplemental Information 1 [file peerj-13-20238-s001.xlsx]

## Sheet: Raw data
DATE	River	Bridge	TIME	Temp (°C)	Sp Cond (μS/cm)	Chlorophyll (μg/L)	PC (ug/L)	ODO (% Sat)	ODO (mg/L)	pH	TP	DTP	PO4-P	T-N	DTN	NOX-N	NH4-N	NO2-N	TP-DTP	TN-DTN	NO3-N	DOP	DON	DOC (mg L-1)	CH4 (nM)	RPD (%)	RPDxCH4 (nM)	Slope (Sp. MO rate h-1)	Slope StdErr	Methane oxidation rate (CH4*Slope, nM h-1)	Areal methane oxidation rate (µmol m-2 h-1)	Areal oxidation rate error (µmol m-2 h-1)	Clough_diffusive CH4 flux(µmol m-2 h-1)	Ray05_diffusive CH4 flux (µmol m-2 h-1)	Ray01_diffusive CH4 flux (µmol m-2 h-1)	Alin03_diffusive CH4 flux (µmol m-2 h-1)	Ray02_diffusive CH4 flux (µmol m-2 h-1)	Average diffusive CH4 flux (µmol m-2 h-1)	SD_diffusive CH4 flux (µmol m-2 h-1)	Flow velocity (m s-1)	Average depth (m)	Discharge (m3 s-1)	15N5+15N4 dA incorporation rate (pmol L-1 h-1)
2022-06-23	Kokai	Nagamine	11:11:54	23.7	200.7	4.05	0.15	91.6	7.67	7.45	0.1025	0.0527	0.0446	1.3916	1.3298	1.1718	0.1176	0.0202	0.0498	0.0618	1.1516	0.0081	0.158	1.92775	909.649	0.356189	3.24007	0.00295375	0.000977185	2.68688	8.03376	2.65795	46.636	104.938	186.228	208.369	228.414	154.917	76.5866	0.215	2.99	45.06	36.0072
2022-07-25	Kokai	Nagamine	10:43:07	27.342	183.8	1.89551	0.01302	89	6.94	7.34	0.0822	0.0556	0.048	1.2204	1.1642	0.9369	0.103	0.0151	0.0266	0.0562	0.9218	0.0076	0.2273	1.54	945.547	0.699982	6.61866	0.00397303	0.000379936	3.75668													249.082
2022-08-25	Kokai	Nagamine	11:20:20	26.922	206.5	3.76	0.21	94.2	7.44	7.58	0.0717	0.0482	0.0356	1.1226	0.9378	0.6726	0.0732	0.0116	0.0235	0.1848	0.661	0.0126	0.2652	1.74267	773.24	9.24214	71.464	0.0134149	0.00176065	10.373	32.2599	5.17841	32.831	78.0437	27.6591	170.479	34.0517	68.6129	60.4519	0.149	3.11	26.55	106.046
2022-09-26	Kokai	Nagamine	11:45:47	22.342	175.4	2.15	0.3	87.8	7.45	7.17	0.0594	0.046	0.0454	2.3198	1.9462	1.6968	0.0372	0.0152	0.0134	0.3736	1.6816	0.0006	0.2494	1.69	351.282	0.103817	0.364689	0.0114327	0.000604203	4.01609	10.4418	0.551944	33.9342	58.7288	187.241	141.105	217.617	127.725	79.6226	0.715	2.6	106.45	71.6542
2022-10-27	Kokai	Nagamine	10:49:02	14.889	225.7	1.38	0.14	96.1	9.49	7.59	0.0471	0.0329	0.0348	1.9132	1.9554	1.9934	0.0392	0.0167	0.0142	-0.0422	1.9767	-0.0019	-0.038	1.28033	498.878	5.83942	29.1316	0.00265469	0.000846943	1.32437	1.8806	0.609947	32.9176	49.1404	68.7915	101.172	81.0772	66.6197	26.6878	0.277	1.42	23.03	67.9993
2022-11-22	Kokai	Nagamine	10:32:45	13.94	251	3.64	0.08	99.3	10.15	7.64	0.1005	0.0617	0.059	2.3504	2.305	2.2924	0.082	0.0318	0.0388	0.0454	2.2606	0.0027	0.0126	1.572	575.429	2.11533	12.1722	-0.00153449	0.000967335	-0.882989	-1.2097	0.763016	31.6965	49.5325	48.4012	95.2199	57.4676	56.4635	23.6088	0.167	1.37	12.94	44.6187
2022-12-20	Kokai	Nagamine	10:32:51	5.901	252	1.05	0.26	100.8	12.47	7.66	0.1144	0.0834	0.0608	2.5454	2.3032	2.2152	0.1376	0.0362	0.031	0.2422	2.179	0.0226	0.088	1.17233	643.8	13.0962	84.3132	8.93626e-05		0.0575317			31.731	42.6553	36.0485	80.2943	42.8292	46.7117	19.3484	0.139	1.34	10.72	2.53348
2023-01-26	Kokai	Nagamine	10:38:44	2.853	274	1.45	0.35	100.1	13.46	7.74	0.1149	0.0698	0.0608	2.7084	2.6114	2.3652	0.2214	0.0386	0.0451	0.097	2.3266	0.009	0.2462	1.49767	786.575	2.17093	17.076	0.00105112	0.000320823	0.826788	1.09136	0.333945	54.0238	47.371	38.861	88.8911	46.1503	55.0594	19.6629	0.135	1.32	10.4	4.56283
2023-02-15	Kokai	Nagamine	10:24:48	6.701	257	3.08	0.4	95.9	11.72	7.31	0.1725	0.1	0.0832	2.6998	2.5982	2.2766	0.276	0.0578	0.0725	0.1016	2.2188	0.0168	0.3216	1.764	641.91			0.000270674	0.000482092	0.173748	0.222398	0.396109	49.4243	45.8839	46.4572	89.3285	54.9183	57.2024	18.3124	0.185	1.28	13.61	19.0535
2023-03-23	Kokai	Nagamine	10:26:37	17.16	272.6	6.79	0.27	95.5	9.16	7.54	0.183	0.1001	0.0864	2.3532	2.2114	1.963	0.1256	0.0456	0.0829	0.1418	1.9174	0.0137	0.2484	1.89667	845.584			0.00366122	7.426e-05	3.09587	3.65312	0.0740959	53.1549	76.3105	57.2918	142.626	67.7247	79.4217	36.4726	0.13	1.18	8.81	211.025
2023-04-13	Kokai	Nagamine	10:42:23	18.734	262	6.37847	0.288241	101.8	9.38	7.71	0.1113	0.0627	0.0472	2.0602	1.811	1.4892	0.1504	0.0382	0.0486	0.2492	1.451	0.0155	0.3218	1.97333	970.351	5.14527	49.9272	0.00330104	0.000864019	3.20317	9.54546	2.54625	41.6944	86.6827	78.0891	155.998	96.0889	91.7105	41.426	0.086	2.98	15.99	190.776
2023-05-11	Kokai	Nagamine	10:35:23	19.45	198.3	3.5	0.13	91.2	8.33	7.21	0.0956	0.0489	0.0422	1.976	1.8704	1.6886	0.1146	0.0186	0.0467	0.1056	1.67	0.0067	0.1818	1.79633	560.448	1.51605	8.49668	0.00326289	0.000418604	1.82868	6.30895	0.815021	23.4288	53.3433	70.6578	99.5397	87.4041	66.8747	29.889	0.128	3.45	28.45	264.709
2023-06-13	Kokai	Nagamine	10:50:32	21.365	178.1	1.26	0.15	90.9	7.88	7.19	0.0804	0.0557	0.0426	1.8064	1.7824	1.5578	0.1142	0.0184	0.0247	0.024	1.5394	0.0131	0.2246	1.528	479.878	4.42997	21.2584	0.00228184	0.00123404	1.09501	3.47117	1.88352	23.2812	51.1585	86.7353	100.072	106.739	73.5971	35.3803	0.192	3.17	37.71	181.381
2023-07-11	Kokai	Nagamine	10:41:28	27.346	183.5	3.1	0.08	85.2	6.67	7.17	0.0852	0.0542	0.0438	1.598	1.5906	1.3658	0.075	0.026	0.031	0.0074	1.3398	0.0104	0.2248	1.685	389.095	7.36043	28.6391	0.00414816	0.000965338	1.61403	5.22945	1.27639	19.0814	47.6189	80.8051	92.9592	99.5434	68.0016	33.876	0.189	3.24	49.49	297.793
2023-08-23	Kokai	Nagamine	10:35:54	28.508	206.2	2.53	0.02	92.7	7.17	7.38	0.0506	0.0415	0.0444	0.9914	1	0.756	0.078	0.0164	0.0091	-0.0086	0.7396	-0.0029	0.244	1.735	716.07	1.51697	10.8626	0.0108097	0.0011211	7.74049	22.37	2.34474	31.9418	82.0128	80.5079	149.202	98.9223	88.5174	42.1254	0.098	2.89	18.24	164.158
2023-09-20	Kokai	Nagamine	10:24:26	27.049	217.8	2.4	0.07	88.9	6.98	7.52	0.0826	0.0504	0.0582	1.824	1.8808	1.7484	0.0522	0.0194	0.0322	-0.0568	1.729	-0.0078	0.1324	1.325	606.149	8.83706	53.5658	0.00636519	0.0040309	3.85826	5.44014	3.47847	48.8613	82.4762	121.58	172.131	142.836	113.577	48.7443	0.303	1.41	28.55	292.31
2022-06-23	Kokai	Shinfukurai	10:35:02	24.2	204.2	3.84	0.24	98	8.15	7.51	0.0783	0.0436	0.0342	1.3908	1.3534	1.242	0.077	0.021	0.0347	0.0374	1.221	0.0094	0.1114	1.909	1270.73	0.497561	6.32263	0.0182673	0.00509759	23.2127	66.3883	18.529	37.7959	123.168	65.2042	213.095	80.1383	103.88	68.4224	0.046	2.86	10.54	54.9259
2022-07-25	Kokai	Shinfukurai	10:19:13	27.977	177.5	2.20381	0.07973	97.7	7.55	7.49	0.057	0.0471	0.0384	1.1602	1.0874	0.9249	0.0457	0.0119	0.0099	0.0728	0.913	0.0087	0.1625	1.6555	874.783	8.37294	73.2451	0.00461921	0.00190966	4.04081													69.7104
2022-08-25	Kokai	Shinfukurai	10:43:47	26.607	206.4	8.03	0.14	99	7.88	7.66	0.0572	0.0448	0.028	0.903	0.8744	0.7318	0.0542	0.013	0.0124	0.0286	0.7188	0.0168	0.1426	1.827	876.169	3.6675	32.1334	0.0161142	0.00087287	14.1188	40.0974	2.62299	34.2091	87.0323	22.7949	178.365	27.9818	70.0767	65.7798	0.111	2.84	25.52	53.374
2022-09-26	Kokai	Shinfukurai	11:06:47	22.263	171.8	1.94	0.28	84.8	7.15	7.14	0.0864	0.0495	0.0476	2.1992	2.1246	1.6736	0.027	0.0156	0.0369	0.0746	1.658	0.0019	0.451	1.736	327.452	2.47362	8.09993	0.0113729	0.00161387	3.72408	6.1075	0.87975	39.6067	56.9142	146.346	138.653	159.122	108.128	55.477	0.778	1.64	103.76	58.1543
2022-10-27	Kokai	Shinfukurai	10:49:02	15.148	222.6	1.24	0.16	100.2	9.85	7.73	0.056	0.0405	0.0385	1.9336	1.9398	1.989	0.0234	0.0128	0.0155	-0.0062	1.9762	0.002	-0.0492	1.27	391.229			0.00273301	0.000872859	1.06923	0.609462	0.194648	49.7168	45.1662	51.2159	100.522	53.545	60.0332	22.8399	0.452	0.57	18.25	52.26
2022-11-22	Kokai	Shinfukurai	09:55:28	13.676	250.8	3.67	0.11	100.4	10.38	7.67	0.0903	0.0671	0.0718	2.38	2.3436	2.7818	0.0726	0.0322	0.0232	0.0364	2.7496	-0.0047	-0.4382	1.51733	512.434	5.00011	25.6223	0.00776766	0.00149488	3.98041	1.9106	0.379902	68.1765	55.4027	54.9259	121.721	56.9395	71.4332	28.6314	0.418	0.48	11.95	52.4822
2022-12-20	Kokai	Shinfukurai	09:54:57	5.658	254.6	1.02	0.24	101.6	12.72	7.68	0.0968	0.0661	0.0616	2.5614	2.4032	2.302	0.1368	0.0374	0.0307	0.1582	2.2646	0.0045	0.1012	1.17233	482.317	3.70944	17.8913	-0.00164929	0.000461312	-0.795481	-0.326147	0.0920232	63.1122	41.0556	37.0403	89.9503	37.6332	53.7583	22.9032	0.411	0.41	11.66	2.73256
2023-01-26	Kokai	Shinfukurai	09:59:21	2.554	270.7	1.24	0.33	98.9	13.39	7.69	0.1035	0.0545	0.051	2.6484	2.6262	2.3412	0.2582	0.043	0.049	0.0222	2.2982	0.0035	0.285	1.626	547.064	1.90245	10.4076	0.00139518	0.000422442	0.763252	0.305301	0.0926234	73.1059	38.8517	29.4676	81.4112	31.3857	50.8444	24.5425	0.311	0.4	9.02	4.41252
2023-02-15	Kokai	Shinfukurai	09:55:24	6.254	252.9	2.52	0.4	95.7	11.81	7.28	0.1696	0.1008	0.075	2.6382	2.5966	2.2584	0.2512	0.0596	0.0688	0.0416	2.1988	0.0258	0.3382	1.763	448.246	8.18287	36.6794	0.00244583	0.00124781	1.09633	0.471423	0.243584	70.3994	40.6965	40.1303	90.9368	39.8255	56.3977	23.3173	0.463	0.43	13.92	15.1003
2023-03-23	Kokai	Shinfukurai	09:46:14	17.09	276	6.81	0.27	92.8	8.9	7.49	0.1772	0.0886	0.078	2.4278	2.3144	2.077	0.1048	0.0504	0.0886	0.1134	2.0266	0.0106	0.2374	1.83167	563.632	0.625853	3.52751	0.00650497	0.0003539	3.66641	1.28324	0.0702747	81.2834	59.7709	40.5876	124.041	42.9778	69.7321	34.4503	0.292	0.35	7.28	172.479
2023-04-13	Kokai	Shinfukurai	10:01:12	17.75	254.5	12.6448	0.576739	112.4	10.6	8.1	0.0979	0.0769	0.045	1.948	1.777	1.4996	0.0622	0.037	0.021	0.171	1.4626	0.0319	0.2774	2.031	607.067	9.36632	56.8599	0.00308835	0.00124759	1.87484	5.51202	2.28574	26.413	52.9795	48.2478	95.5192	59.3346	56.4988	25.0812	0.088	2.94	20.93	111.905
2023-05-11	Kokai	Shinfukurai	09:55:54	18.833	192.9	2.54	0.12	96.1	8.9	7.22	0.0956	0.0497	0.0394	2.0404	1.9656	1.7674	0.0962	0.021	0.0459	0.0748	1.7464	0.0103	0.1982	1.70533	517.228	2.73919	14.1679	0.00310684	0.000939145	1.60695	4.82084	1.46323	21.3326	47.3557	50.7699	86.8323	62.4676	53.7516	23.828	0.107	3	28.76	143.657
2023-06-13	Kokai	Shinfukurai	10:07:16	21.222	176	1.96	0.18	90.8	7.83	7.21	0.0692	0.0469	0.0416	1.7258	1.6714	1.4922	0.0948	0.0166	0.0223	0.0544	1.4756	0.0053	0.1792	1.553	508.639	2.66339	13.547	0.00728736	0.000698483	3.70664	11.9724	1.19102	22.3166	51.6567	73.8774	97.9903	91.096	67.3874	30.9014	0.149	3.23	42.69	176.851
2023-07-11	Kokai	Shinfukurai	09:58:41	28.26	190.1	4.11	0.13	88.5	6.86	7.28	0.0776	0.0525	0.0434	1.5514	1.4956	1.266	0.1032	0.0266	0.0251	0.0558	1.2394	0.0091	0.2296	1.774	525.883	10.6407	55.9577	0.00489369	0.00165226	2.57351	8.51832	3.0155	24.2687	64.2117	99.2959	123.081	122.522	86.676	42.3346	0.163	3.31	50.25	290.75
2023-08-23	Kokai	Shinfukurai	10:00:10	28.96	202.1	5.2	0.14	94.1	7.21	7.37	0.0622	0.0305	0.0304	0.9774	0.9648	0.7708	0.05	0.016	0.0317	0.0126	0.7548	0.0001	0.194	1.592	831.029	1.43834	11.953	0.0160026	0.00263254	13.2986	45.3483	7.48858	34.9775	96.2836	102.528	175.009	126.834	107.127	50.8445		3.41		207.799
2023-09-20	Kokai	Shinfukurai	09:50:16	27.232	210.9	2.2	0.08	93.9	7.4	7.63	0.0699	0.0586	0.0662	1.9088	1.7906	1.712	0.0378	0.019	0.0113	0.1182	1.693	-0.0076	0.0786	1.246	388.597	4.7062	18.2882	0.00224329	0.00103532	0.871736	0.557911	0.258822	62.1152	67.1538	92.4558	156.311	91.9155	93.9903	37.5059	0.591	0.64	27.22	236.172
2022-06-23	Kokai	Joso
2022-07-25	Kokai	Joso	09:12:50	27.884	166.1	7.4448	0.22268	101.7	7.99	8.19	0.066	0.0442	0.0347	1.1612	1.0848	0.918	0.0439	0.0138	0.0218	0.0764	0.9042	0.0095	0.1668	1.734	366.78	10.1362	37.1776	0.00709569	0.00151882	2.60256	3.09705	0.733489	40.2235	63.049	118.89	116.167	136.883	95.0426	41.2139	0.371	1.19	20.92	90.2647
2022-08-25	Kokai	Joso	10:06:56	26.822	200.4	19.43	0.73	107.6	8.57	8.08	0.0517	0.025	0.0152	1.1474	0.7204	0.5916	0.011	0.0116	0.0267	0.427	0.58	0.0098	0.1288	1.95575	237.149	4.41975	10.4814	0.0251515	0.00395321	5.96466	7.45582	1.21733	20.7951	32.3935	46.5888	68.3125	54.2002	44.458	18.5336	0.324	1.25	19.16	132.537
2022-09-26	Kokai	Joso	10:24:05	22.724	166	2.05	0.14	80.4	6.86	7.14	0.0985	0.0536	0.0492	2.2402	1.9124	1.597	0.0148	0.0146	0.0449	0.3278	1.5824	0.0044	0.3154	1.927	308.536	2.55684	7.88879	0.0072323	0.000589795	2.23143	6.38188	0.545424	29.4094	67.3795	267.784	129.841	312.006	161.284	123.751	0.759	2.86	102.66	94.1641
2022-10-27	Kokai	Joso	10:13:51	14.32	221	1.1	0.15	106	10.54	7.76	0.058	0.0363	0.0356	1.8598	1.9666	1.8734	0.0259	0.0112	0.0217	-0.1068	1.8622	0.0007	0.0932	1.372	384.824	2.32646	8.95279	0.00987618	0.00226937	3.8006	4.52271	1.04466	28.6856	44.072	75.8454	80.2639	88.1624	63.4059	25.6472	0.308	1.19	17.18	29.7407
2022-11-22	Kokai	Joso	09:09:29	12.86	258.5	3.26	0.07	95.5	10.02	7.65	0.0746	0.0479	0.0396	2.3674	2.3814	2.2278	0.0494	0.0204	0.0267	-0.014	2.2074	0.0083	0.1536	1.60367	409.588	2.78145	11.3925	0.00499383	0.000690156	2.04541	2.02496	0.285464	30.1542	41.4078	56.4946	74.3118	65.5505	53.5838	17.8783	0.241	0.99	11.15	39.9628
2022-12-20	Kokai	Joso	09:12:34	4.568	257.9	1.1	0.26	101.3	12.58	7.61	0.0855	0.0531	0.0448	2.3996	2.4516	2.2588	0.1376	0.036	0.0324	-0.052	2.2228	0.0083	0.1928	1.18567	309.262	4.15763	12.858	0.00141311	0.000768846	0.437022	0.480724	0.262315	19.7725	23.8622	33.0383	42.6446	38.6282	31.5892	9.65933	0.224	1.1	11.06	3.31271
2023-01-26	Kokai	Joso	09:21:34	1.471	277.7	1.38	0.33	94.8	13.19	7.69	0.1123	0.059	0.0536	2.6648	2.64	2.4162	0.229	0.0508	0.0533	0.0248	2.3654	0.0054	0.2238	1.522	451.319	5.81345	26.2372	0.00261798	0.000819649	1.18154	1.19336	0.380008	36.4177	29.9139	34.633	52.8266	40.4979	38.8578	8.68352	0.18	1.01	8.41	5.32364
2023-02-15	Kokai	Joso	09:21:04	4.625	254.9	3.17	0.45	93.4	12.02	7.31	0.1789	0.085	0.0728	2.8136	2.6334	2.3406	0.2494	0.0652	0.0939	0.1802	2.2754	0.0122	0.2928	1.728	331.74	1.24169	4.11919	0.00354218	0.00137456	1.17508	1.22208	0.474478	29.6598	26.3942	36.8944	47.3565	42.9299	36.6469	8.77738	0.24	1.04	11.21	18.8019
2023-03-23	Kokai	Joso	09:10:50	16.851	280.7	8.54	0.33	91.3	8.78	7.52	0.1557	0.0739	0.0652	2.3782	2.3352	2.0602	0.1106	0.0484	0.0818	0.043	2.0118	0.0087	0.275	1.843	449.068	2.74428	12.3237	0.00702404	0.000685486	3.15427	2.77576	0.281397	38.4583	49.0053	59.0351	87.4218	68.2687	60.4379	18.7432	0.217	0.88	8.57	209.008
2023-04-13	Kokai	Joso	09:23:59	17.69	245.7	61.2204	1.63379	125.1	11.83	9.21	0.0889	0.0228	0.008	1.7434	1.432	1.2286	0.0136	0.0442	0.0661	0.3114	1.1844	0.0148	0.2034	2.29267	265.816	0.0851294	0.226287	0.00152025	1.52691e-05	0.404106	0.476845	0.00480651	22.3205	30.9577	47.6213	55.7027	55.7152	42.4635	15.1295	0.252	1.18	16.13	223.43
2023-05-11	Kokai	Joso	09:24:54	18.255	171.4	4.87	0.2	99.7	9.3	7.28	0.0941	0.0402	0.0294	1.8548	2.1216	1.6682	0.0786	0.0202	0.0539	-0.2668	1.648	0.0108	0.4534	1.74433	399.324	7.32841	29.2641	0.00718402	0.000936145	2.86875	3.55725	0.531819	35.4298	52.7511	97.5407	96.6617	113.162	79.1091	33.2041	0.34	1.24	19.58	112.934
2023-06-13	Kokai	Joso	09:26:50	21.028	170.6	2.15	0.17	97	8.45	7.3	0.0649	0.0417	0.037	1.6364	1.6294	1.4204	0.0618	0.013	0.0232	0.007	1.4074	0.0047	0.209	1.593	358.965	1.16701	4.18916	0.00550236	0.000277145	1.97515	3.67379	0.189945	36.4088	71.2499	217.565	136.453	245.706	141.477	90.346	0.685	1.86	57.54	96.2318
2023-07-11	Kokai	Joso	09:15:03	27.667	194.9	16.52	0.63	109	8.52	7.69	0.064	0.0252	0.0174	1.4834	1.423	1.2128	0.0098	0.0174	0.0388	0.0604	1.1954	0.0078	0.2102	1.622	382.612	1.25601	4.80565	0.0100324	0.000824523	3.83853	7.13967	0.593592	40.7469	87.803	266.093	167.912	301.482	172.807	111.746	0.669	1.86	56.99	225.282
2023-08-23	Kokai	Joso	09:16:39	29.19	179.5	12.64	0.48	104.9	8.02	7.65	0.0434	0.0204	0.0156	0.9398	0.8184	0.6814	0.0102	0.0118	0.023	0.1214	0.6696	0.0048	0.137	1.574	438.54	0.530783	2.3277	0.0275316	0.00020906	12.0737	14.9714	0.138705	45.4839	78.2841	150.745	144.213	174.09	118.563	54.1751	0.37	1.24	19.86	379.161
2023-09-20	Kokai	Joso	09:11:22	26.816	209.4	2.48	0.07	96.6	7.68	7.54	0.0691	0.0449	0.0462	1.7764	1.7708	1.7154	0.0146	0.0132	0.0242	0.0056	1.7022	-0.0013	0.0554	1.238	480.698	16.9143	81.3067	0.0110112	0.00216575	5.29306	7.46322	1.93605	44.7471	84.9833	185.204	157.747	214.247	137.386	70.5989	0.417	1.41	26.63	183.055
2022-06-23	Kokai	Yamato	09:39:20	24.6	202.2	20.46	0.83	106.9	8.92	8.05	0.0506	0.0326	0.0186	1.202	1.1554	1.0306	0.009	0.0172	0.018	0.0466	1.0134	0.014	0.1248	2.00533	334.784	6.00847	20.1154	0.0111575	0.00404208	3.73537	4.55715	1.67349	33.5479	56.0811	113.504	104.162	129.778	87.4144	40.7405	0.421	1.22	24.67	33.7144
2022-07-25	Kokai	Yamato	09:45:45	28.581	166.1	7.48885	0.28939	105.3	8.11	7.81	0.0629	0.0401	0.0316	1.0978	1.0969	0.9139	0.0224	0.013	0.0228	0.0009	0.9009	0.0085	0.183	1.69633	340.075	0.351061	1.19387	0.00416648	0.000179316	1.41692	1.74281	0.0752556	37.8366	61.0586	120.509	112.929	138.54	94.1748	42.6738	0.394	1.23	23.37	81.6043
2022-08-25	Kokai	Yamato	09:34:39	26.631	199.9	19.94	0.82	109.2	8.74	8.2	0.0553	0.0222	0.015	0.7412	0.658	0.5526	0.0038	0.0106	0.0331	0.0832	0.542	0.0072	0.1054	1.86467	255.892	7.39978	18.9354	0.0327891	0.00104884	8.39046	10.4042	0.838738	22.8161	35.1393	51.2338	74.4576	59.4905	48.6275	20.2494	0.334	1.24	19.91	176.205
2022-09-26	Kokai	Yamato	09:43:35	22.589	163.4	1.82	0.18	78.2	6.7	8.3	0.1021	0.0529	0.0484	1.996	2.0024	1.6338	0.0132	0.0152	0.0492	-0.0064	1.6186	0.0045	0.3686	1.976	287.144	0.026738	0.0767766	0.00830556	0.000784705	2.3849	5.91454	0.558805	35.1487	84.5201	347.341	167.104	359.953	198.813	149.065	1.207	2.48	143.86	103.3
2022-10-27	Kokai	Yamato	09:42:06	13.738	225	1.41	0.15	104.5	10.48	7.74	0.0601	0.037	0.0303	1.9526	1.9112	1.9242	0.0245	0.0108	0.0231	0.0414	1.9134	0.0067	-0.013	1.33833	241.047			0.00311385	0.000914322	0.750582	0.758088	0.222598	20.6367	28.7974	49.0632	52.9676	55.9191	41.4768	15.7579	0.361	1.01	17.9	26.0854
2022-11-22	Kokai	Yamato	08:39:31	12.999	264.1	2.22	-0.02	96.4	9.84	7.61	0.0708	0.048	0.0486	2.5812	2.3668	2.6038	0.0662	0.0224	0.0228	0.2144	2.5814	-0.0006	-0.237	1.57267	295.858	13.3821	39.5921	0.00339871	0.00165021	1.00553	0.894926	0.450725	24.8428	31.971	45.7467	58.0356	52.3379	42.5868	13.886	0.292	0.89	12.03	42.297
2022-12-20	Kokai	Yamato	08:46:15	4.436	261.1	1.05	0.26	100.7	12.72	7.52	0.0609	0.0532	0.0432	2.4604	2.5342	2.2766	0.1574	0.0294	0.0077	-0.0738	2.2472	0.01	0.2576	1.19533	302.25	15.3947	46.5305	0.00140604	0.00226983	0.424976	0.216738	0.351477	37.6674	31.2265	41.5974	58.4617	42.2118	42.233	10.0718	0.477	0.51	11.43	3.55725
2023-01-26	Kokai	Yamato	08:50:26	1.067	278.7	1.49	0.38	94.7	13.27	7.68	0.1155	0.0675	0.0062	2.6074	2.5236	2.357	0.2918	0.0532	0.048	0.0838	2.3038	0.0613	0.1666	1.982	345.31	16.0926	55.5696	0.00224058	0.00224267	0.773697	0.340427	0.34512	47.005	28.6762	31.4775	52.8085	33.041	38.6016	10.6377	0.368	0.44	7.68	4.45075
2023-02-15	Kokai	Yamato	08:50:29	4.507	259.5	3.38	0.43	93.7	12	7.32	0.1527	0.0801	0.0662	2.752	2.604	2.3278	0.2454	0.063	0.0726	0.148	2.2648	0.0139	0.2762	1.76467	265.243	4.1361	10.9707	0.00109015	0.000510303	0.289155	0.156144	0.0733759	36.0207	25.7847	33.2517	47.8177	35.1405	35.6031	7.92962	0.411	0.54	12.59	14.411
2023-03-23	Kokai	Yamato	08:45:37	16.653	280.7	7.3	0.29	89.2	8.6	7.51	0.1447	0.0768	0.067	2.3468	2.2596	2.0438	0.0772	0.04	0.0679	0.0872	2.0038	0.0098	0.2158	1.84333	380.259	3.76416	14.3135	0.00538019	0.00128805	2.04586	0.941097	0.228072	54.8665	51.0164	58.8567	94.2796	61.5212	64.1081	17.3305	0.389	0.46	10.04	209.408
2023-04-13	Kokai	Yamato	08:47:35	16.804	249.5	62.196	1.61493	129.5	12.38	9.16	0.0838	0.0219	0.0056	1.5828	1.4028	1.1598	0.01	0.0428	0.0619	0.18	1.117	0.0163	0.243	2.34433	341.828	22.8628	78.1515	0.00283548	0.00294279	0.969246	1.04679	1.11245	32.1522	41.9653	68.7624	76.4577	79.4247	59.7525	21.3623	0.31	1.08	16.55	251.813
2023-05-11	Kokai	Yamato	08:52:31	18.114	174.5	7.65	0.25	100.1	9.24	7.36	0.0819	0.0328	0.0264	1.9116	1.8144	1.6672	0.0642	0.0188	0.0491	0.0972	1.6484	0.0064	0.1472	1.80933	342.4	1.99817	6.84174	0.00102032	0.000230686	0.349357	0.447176	0.101497	32.5764	49.0628	101.374	91.0571	116.447	78.1034	35.6917	0.416	1.28	27.86	144.246
2023-06-13	Kokai	Yamato	08:49:27	20.865	171.4	2	0.17	95.9	8.41	7.33	0.0651	0.0419	0.032	1.6536	1.6166	1.4494	0.0506	0.0128	0.0232	0.037	1.4366	0.0099	0.1672	1.551	359.663	4.43878	15.9647	0.00615475	0.00113365	2.21364	4.56009	0.863974	32.956	66.2337	204.848	125.852	237.169	133.412	87.3644	0.603	2.06	58.56	88.863
2023-07-11	Kokai	Yamato	08:49:33	27.926	195.8	14.43	0.51	113.9	8.84	7.86	0.0592	0.0217	0.0156	1.4204	1.351	1.1896	0.0044	0.0166	0.0375	0.0694	1.173	0.0061	0.1614	1.667	353.605	11.8641	41.952	0.00978972	0.00355121	3.46169	6.40414	2.44419	33.3404	70.2939	192.106	132.082	223.785	130.322	79.9447	0.505	1.85	50.28	303.869
2023-08-23	Kokai	Yamato	08:51:16	29.1	180.4	15.39	0.6	107.3	8.22	7.76	0.0463	0.0188	0.0154	0.9714	0.8152	0.6718	0.0032	0.0116	0.0275	0.1562	0.6602	0.0034	0.1434	1.74	424.857	3.29714	14.0081	0.026789	0.002753	11.3815	18.6657	2.0145	35.3577	68.8476	136.79	124.95	162.253	105.64	52.0614	0.291	1.64	23.68	341.65
2023-09-20	Kokai	Yamato	08:46:09	26.293	215.6	2.75	0.12	94.1	7.56	7.5	0.0675	0.0424	0.0468	1.859	1.9382	1.7696	0.0142	0.0126	0.0251	-0.0792	1.757	-0.0044	0.1686	1.236	406.896	2.59523	10.5599	0.0105403	0.00154648	4.28881	5.48968	0.817953	39.2429	70.7335	145.84	131.236	167.582	110.927	53.8407	0.414	1.28	26.41	150.624

## Sheet: Segment average & Finternal
DATE	Segment	Temp (°C)	Sp Cond (μS/cm)	Chlorophyll (μg/L)	PC (ug/L)	ODO (% Sat)	ODO (mg/L)	pH	TP	DTP	PO4-P	T-N	DTN	NOX-N	NH4-N	NO2-N	TP-DTP	TN-DTN	NO3-N	DOP	DON	DOC (mg L-1)	CH4 (nM)	Slope (Sp. MO rate h-1)	Methane oxidation rate (CH4*Slope, nM h-1)	Diffusive flux into atmosphere（mmol m-2 d-1)	Flow velocity (m/s)	Average depth (m)	Discharge (t/s)	15N5+15N4 dA incorporation rate (pmol L-1 h-1)	Foxidation (µmol m-2 h-1)	Cumulative error_Foxidation (µmol m-2 h-1)	Foutgassing (µmol m-2 h-1）	Cumulative error_Foutgassing (µmol m-2 h-1）	Finternal (µmol m-2 h-1)	Cumulative error_Finternal (µmol m-2 h-1）	Foxidation/Foutgassing	Cumulative error_Foxidation/Foutgassing
2022-06-23	Nagamine~Shin-fukurai	23.95	202.45	3.945	0.195	94.8	7.91	7.48	0.0904	0.04815	0.0394	1.3912	1.3416	1.2069	0.0973	0.0206	0.04225	0.0496	1.1863	0.00875	0.1347	1.91837	1090.19	0.0106105	12.9498	1.01318	0.1305	2.925	27.8	45.4665	37.211	9.35933	129.399	51.3496			0.287569	0.135108
2022-08-25	Nagamine~Shin-fukurai	26.7645	206.45	5.895	0.175	96.6	7.66	7.62	0.06445	0.0465	0.0318	1.0128	0.9061	0.7022	0.0637	0.0123	0.01795	0.1067	0.6899	0.0147	0.2039	1.78483	824.704	0.0147646	12.2459	0.804481	0.13	2.975	26.035	79.7098	36.1786	2.90241	69.3448	44.6694	137.869	44.7636	0.521721	0.33867
2022-09-26	Nagamine~Shin-fukurai	22.3025	173.6	2.045	0.29	86.3	7.3	7.155	0.0729	0.04775	0.0465	2.2595	2.0354	1.6852	0.0321	0.0154	0.02515	0.2241	1.6698	0.00125	0.3502	1.713	339.367	0.0114028	3.87009	0.882491	0.7465	2.12	105.105	64.9043	8.27467	0.519279	117.927	48.5218	95.1195	48.5246	0.0701678	0.0292049
2022-10-27	Nagamine~Shin-fukurai	15.0185	224.15	1.31	0.15	98.15	9.67	7.66	0.05155	0.0367	0.03665	1.9234	1.9476	1.9912	0.0313	0.01475	0.01485	-0.0242	1.97645	5e-05	-0.0436	1.27517	445.054	0.00269385	1.1968	0.991612	0.3645	0.995	20.64	60.1296	1.24503	0.320126	63.3265	17.5635	34.2081	17.5664	0.0196606	0.00743559
2022-11-22	Nagamine~Shin-fukurai	13.808	250.9	3.655	0.095	99.85	10.265	7.655	0.0954	0.0644	0.0654	2.3652	2.3243	2.5371	0.0773	0.032	0.031	0.0409	2.5051	-0.001	-0.2128	1.54467	543.932	0.00311658	1.54871	1.19848	0.2925	0.925	12.445	48.5504	0.350452	0.42618	63.9483	18.5549	53.925	18.5598	0.00548023	0.00685152
2022-12-20	Nagamine~Shin-fukurai	5.7795	253.3	1.035	0.25	101.2	12.595	7.67	0.1056	0.07475	0.0612	2.5534	2.3532	2.2586	0.1372	0.0368	0.03085	0.2002	2.2218	0.01355	0.0946	1.17233	563.058	-0.000779964	-0.368975	1.13812	0.275	0.875	11.19	2.63302	-0.326147	0.0920232	50.235	14.991	25.3577	14.9913	-0.00649242	-0.00266635
2023-01-26	Nagamine~Shin-fukurai	2.7035	272.35	1.345	0.34	99.5	13.425	7.715	0.1092	0.06215	0.0559	2.6784	2.6188	2.3532	0.2398	0.0408	0.04705	0.0596	2.3124	0.00625	0.2656	1.56183	666.82	0.00122315	0.79502	1.52556	0.223	0.86	9.71	4.48768	0.69833	0.173276	52.9519	15.7239	21.6884	15.7249	0.013188	0.00510336
2023-02-15	Nagamine~Shin-fukurai	6.4775	254.95	2.8	0.4	95.8	11.765	7.295	0.17105	0.1004	0.0791	2.669	2.5974	2.2675	0.2636	0.0587	0.07065	0.0716	2.2088	0.0213	0.3299	1.7635	545.078	0.00135825	0.63504	1.43788	0.324	0.855	13.765	17.0769	0.34691	0.232506	56.8001	14.8243	21.2815	14.8261	0.00610757	0.00439282
2023-03-23	Nagamine~Shin-fukurai	17.125	274.3	6.8	0.27	94.15	9.03	7.515	0.1801	0.09435	0.0822	2.3905	2.2629	2.02	0.1152	0.048	0.08575	0.1276	1.972	0.01215	0.2429	1.86417	704.608	0.00508309	3.38114	1.61326	0.211	0.765	8.045	191.752	2.46818	0.0510606	74.5769	25.0852	45.1965	25.0853	0.0330958	0.0111534
2023-04-13	Nagamine~Shin-fukurai	18.242	258.25	9.51162	0.43249	107.1	9.99	7.905	0.1046	0.0698	0.0461	2.0041	1.794	1.4944	0.1063	0.0376	0.0348	0.2101	1.4568	0.0237	0.2996	2.00217	788.709	0.0031947	2.53901	0.817288	0.087	2.96	18.46	151.34	7.52874	1.71085	74.1047	24.2135	4.56157	24.2739	0.101596	0.0404351
2023-05-11	Nagamine~Shin-fukurai	19.1415	195.6	3.02	0.125	93.65	8.615	7.215	0.0956	0.0493	0.0408	2.0082	1.918	1.728	0.1054	0.0198	0.0463	0.0902	1.7082	0.0085	0.19	1.75083	538.838	0.00318487	1.71781	0.537138	0.1175	3.225	28.605	204.183	5.5649	0.83745	60.3132	19.1123	52.4689	19.1307	0.0922666	0.0323674
2023-06-13	Nagamine~Shin-fukurai	21.2935	177.05	1.61	0.165	90.85	7.855	7.2	0.0748	0.0513	0.0421	1.7661	1.7269	1.525	0.1045	0.0175	0.0235	0.0392	1.5075	0.0092	0.2019	1.5405	494.258	0.0047846	2.40082	0.547174	0.1705	3.2	40.2	179.116	7.7218	1.11425	70.4922	23.4875	90.8965	23.514	0.109541	0.0397742
2023-07-11	Nagamine~Shin-fukurai	27.803	186.8	3.605	0.105	86.85	6.765	7.225	0.0814	0.05335	0.0436	1.5747	1.5431	1.3159	0.0891	0.0263	0.02805	0.0316	1.2896	0.00975	0.2272	1.7295	457.489	0.00452092	2.09377	0.520202	0.176	3.275	49.87	294.271	6.87388	1.63726	77.3388	27.11	148.794	27.1594	0.0888802	0.0376675
2023-08-23	Nagamine~Shin-fukurai	28.734	204.15	3.865	0.08	93.4	7.19	7.375	0.0564	0.036	0.0374	0.9844	0.9824	0.7634	0.064	0.0162	0.0204	0.002	0.7472	-0.0014	0.219	1.6635	773.55	0.0134061	10.5196	0.803032	0.098	3.15	18.24	185.979	33.8592	3.92354	97.822	33.014	160.193	33.2464	0.34613	0.12351
2023-09-20	Nagamine~Shin-fukurai	27.1405	214.35	2.3	0.075	91.4	7.19	7.575	0.07625	0.0545	0.0622	1.8664	1.8357	1.7302	0.045	0.0192	0.02175	0.0307	1.711	-0.0077	0.1055	1.2855	497.373	0.00430424	2.365	1.33172	0.447	1.025	27.885	264.241	2.99903	1.74404	103.784	30.7518	32.6155	30.8012	0.0288969	0.0188603
2022-07-25	Joso~Yamato	28.2325	166.1	7.46683	0.256035	103.5	8.05	8	0.06445	0.04215	0.03315	1.1295	1.09085	0.91595	0.03315	0.0134	0.0223	0.03865	0.90255	0.009	0.1749	1.71517	353.428	0.00563109	2.00974	0.936721	0.3825	1.21	22.145	85.9345	2.41993	0.36867	94.6087	29.6632	76.3638	29.6655	0.0255783	0.00891632
2022-08-25	Joso~Yamato	26.7265	200.15	19.685	0.775	108.4	8.655	8.14	0.0535	0.0236	0.0151	0.9443	0.6892	0.5721	0.0074	0.0111	0.0299	0.2551	0.561	0.0085	0.1171	1.91021	246.52	0.0289703	7.17756	0.523335	0.329	1.245	19.535	154.371	8.93	0.739148	46.5427	13.7253	68.3306	13.7451	0.191867	0.0587671
2022-09-26	Joso~Yamato	22.6565	164.7	1.935	0.16	79.3	6.78	7.72	0.1003	0.05325	0.0488	2.1181	1.9574	1.6154	0.014	0.0149	0.04705	0.1607	1.6005	0.00445	0.342	1.9515	297.84	0.00776893	2.30816	0.774698	0.983	2.67	123.26	98.7322	6.14821	0.390432	180.049	96.8691			0.0341475	0.0184994
2022-10-27	Joso~Yamato	14.029	223	1.255	0.15	105.25	10.51	7.75	0.05905	0.03665	0.03295	1.9062	1.9389	1.8988	0.0252	0.011	0.0224	-0.0327	1.8878	0.0037	0.0401	1.35517	312.935	0.00649501	2.27559	0.591868	0.3345	1.1	17.54	27.913	2.6404	0.534055	52.4413	15.0507	-33.0814	15.0601	0.0503495	0.0176783
2022-11-22	Joso~Yamato	12.9295	261.3	2.74	0.025	95.95	9.93	7.63	0.0727	0.04795	0.0441	2.4743	2.3741	2.4158	0.0578	0.0214	0.02475	0.1002	2.3944	0.00385	-0.0417	1.58817	352.723	0.00419627	1.52547	0.659964	0.2665	0.94	11.59	41.1299	1.45994	0.26676	48.0853	11.3187	2.25102	11.3218	0.0303615	0.00904721
2022-12-20	Joso~Yamato	4.502	259.5	1.075	0.26	101	12.65	7.565	0.0732	0.05315	0.044	2.43	2.4929	2.2677	0.1475	0.0327	0.02005	-0.0629	2.235	0.00915	0.2252	1.1905	305.756	0.00140958	0.430999	0.689279	0.3505	0.805	11.245	3.43498	0.348731	0.219286	36.9111	6.97752	34.377	6.98097	0.00944787	0.00620357
2023-01-26	Joso~Yamato	1.269	278.2	1.435	0.355	94.75	13.23	7.685	0.1139	0.06325	0.0299	2.6361	2.5818	2.3866	0.2604	0.052	0.05065	0.0543	2.3346	0.03335	0.1952	1.752	398.315	0.00242928	0.97762	1.00107	0.274	0.725	8.045	4.8872	0.766893	0.256668	38.7297	6.86593	8.32773	6.87072	0.0198011	0.00749943
2023-02-15	Joso~Yamato	4.566	257.2	3.275	0.44	93.55	12.01	7.315	0.1658	0.08255	0.0695	2.7828	2.6187	2.3342	0.2474	0.0641	0.08325	0.1641	2.2701	0.01305	0.2845	1.74633	298.491	0.00231617	0.732118	0.788166	0.3255	0.79	11.9	16.6065	0.689114	0.240059	36.125	5.91441	10.0474	5.91928	0.0190758	0.00734254
2023-03-23	Joso~Yamato	16.752	280.7	7.92	0.31	90.25	8.69	7.515	0.1502	0.07535	0.0661	2.3625	2.2974	2.052	0.0939	0.0442	0.07485	0.0651	2.0078	0.00925	0.2454	1.84317	414.663	0.00620212	2.60007	1.1199	0.303	0.67	9.305	209.208	1.85843	0.181108	62.273	12.7638	42.5094	12.7651	0.0298432	0.00677301
2023-04-13	Joso~Yamato	17.247	247.6	61.7082	1.62436	127.3	12.105	9.185	0.08635	0.02235	0.0068	1.6631	1.4174	1.1942	0.0118	0.0435	0.064	0.2457	1.1507	0.01555	0.2232	2.3185	303.822	0.00217787	0.686676	0.653672	0.281	1.13	16.34	237.621	0.761816	0.55623	51.108	13.0887	91.8674	13.1005	0.014906	0.0115335
2023-05-11	Joso~Yamato	18.1845	172.95	6.26	0.225	99.9	9.27	7.32	0.088	0.0365	0.0279	1.8832	1.968	1.6677	0.0714	0.0195	0.0515	-0.0848	1.6482	0.0086	0.3003	1.77683	370.862	0.00410217	1.60905	0.816074	0.378	1.26	23.72	128.59	2.00221	0.270709	78.6063	24.3742			0.0254714	0.00861635
2023-06-13	Joso~Yamato	20.9465	171	2.075	0.17	96.45	8.43	7.315	0.065	0.0418	0.0345	1.645	1.623	1.4349	0.0562	0.0129	0.0232	0.022	1.422	0.0073	0.1881	1.572	359.314	0.00582855	2.0944	0.832377	0.644	1.96	58.05	92.5474	4.11694	0.442304	137.444	62.839	143.019	62.8405	0.0299535	0.0140677
2023-07-11	Joso~Yamato	27.7965	195.35	15.475	0.57	111.45	8.68	7.775	0.0616	0.02345	0.0165	1.4519	1.387	1.2012	0.0071	0.017	0.03815	0.0649	1.1842	0.00695	0.1858	1.6445	368.109	0.00991108	3.65011	0.889048	0.587	1.855	53.635	264.575	6.7719	1.25762	151.564	68.6994	106.48	68.7109	0.04468	0.021886
2023-08-23	Joso~Yamato	29.145	179.95	14.015	0.54	106.1	8.12	7.705	0.04485	0.0196	0.0155	0.9556	0.8168	0.6766	0.0067	0.0117	0.02525	0.1388	0.6649	0.0041	0.1402	1.657	431.698	0.0271603	11.7276	0.970099	0.3305	1.44	21.77	360.405	16.8185	1.00964	112.101	37.5677	118.241	37.5813	0.15003	0.0510786
2023-09-20	Joso~Yamato	26.5545	212.5	2.615	0.095	95.35	7.62	7.52	0.0683	0.04365	0.0465	1.8177	1.8545	1.7425	0.0144	0.0129	0.02465	-0.0368	1.7296	-0.00285	0.112	1.237	443.797	0.0107758	4.79094	1.00788	0.4155	1.345	26.52	166.84	6.47645	1.05087	124.156	44.3932	61.5412	44.4056	0.0521637	0.0204823
